# Supplementary material for: Realizing the cooking recipe of materials synthesis through large language models
Source: Royal Society of Chemistry journal article supplement (doi:10.1039/d3ta05457h), 2023-01-01
Supplement: d3ta05457h1.pdf [file d3ta05457h1.pdf]

**Supplementary Information for**

**Realizing the cooking recipe of materials synthesis through large language model**

Jaydeep Thik, Siwen Wang, Chuhong Wang, Hadi Mansourifar, Honghong Lin, Keiichi Okubo,  
and Chen Ling\*

Toyota Motor Engineering and Manufacturing North America Inc, 1555 Woodridge Avenue,  
Ann Arbor, Michigan, United States, 48105

Corresponding author: [chen.ling@toyota.com](mailto:chen.ling@toyota.com)

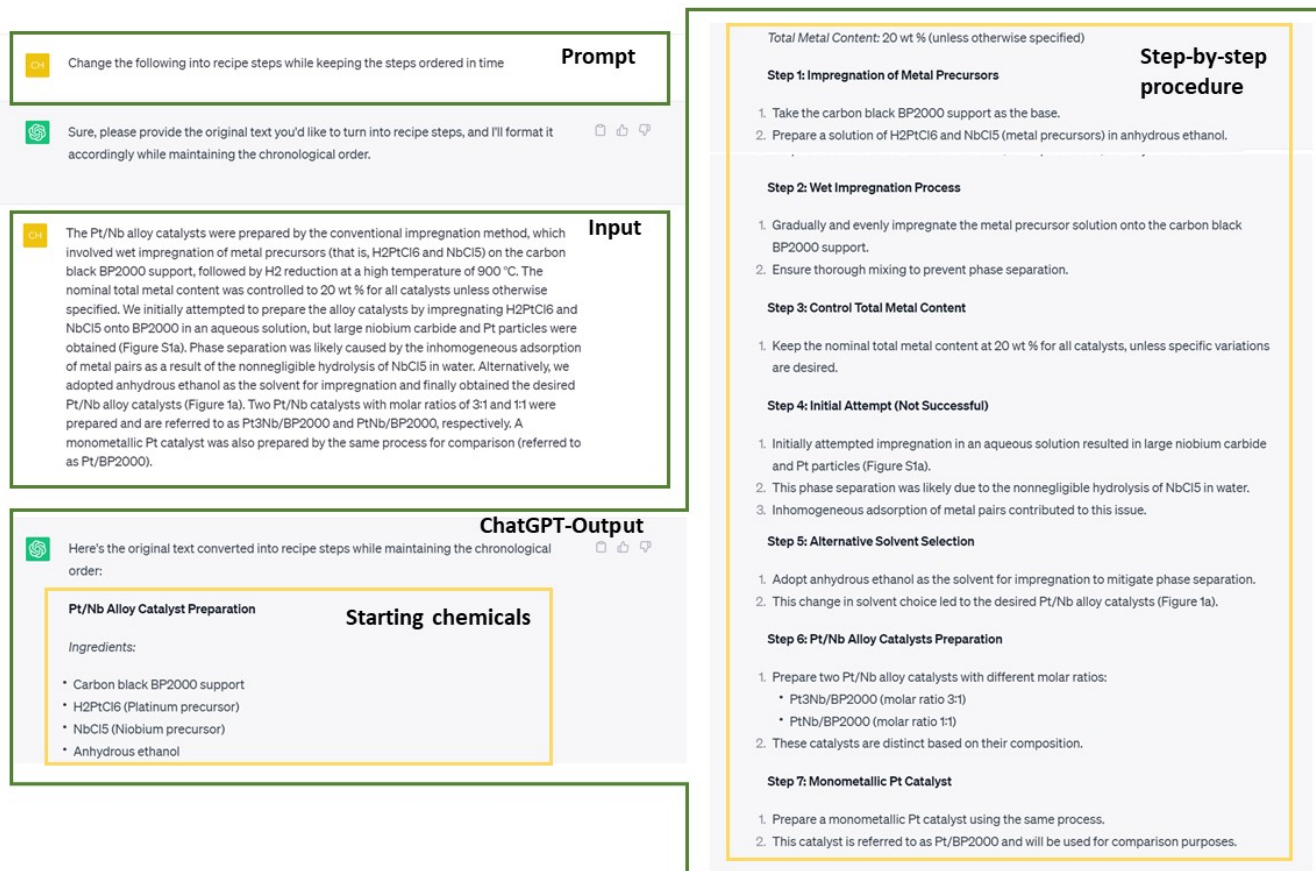

Supplementary Fig. 1. An example of ChatGPT prompt and output to break down materials synthesis information.
