# Supplementary material for: Realizing the cooking recipe of materials synthesis through large language models
Source: Royal Society of Chemistry journal article supplement (doi:10.1039/d3ta05457h), 2023-01-01
Supplement: d3ta05457h2.xlsx [file d3ta05457h2.xlsx]

## Sheet: Sheet1
Original Paragraph	Ref
All reactions were carried out under air. Heat-up method: Pb(SCN)2 (0.2 mmol), PbI2 (0.1 mmol), and either SbI3 or BiI3 (0.1 mmol) were stirred together in a 100 mL round-bottom flask containing 1-octadecene (10 mL, 31 mmol), oleic acid (0.25 mL, 0.8 mmol), and oleylamine (0.25 mL, 0.8 mmol) at 110 °C until all solids dissolved. The solution was heated to 270 °C (Pb2SbS2I3) or 300 °C (Pb2BiS2I3) …	Chem. Mater. 2023, 35, 2165−2172 https://doi.org/10.1021/acs.chemmater.3c00011
Polymer Synthesis To prepare the copolymers of PLGA and biomolecules, we employed our previously reported brush copolymer strategy where two separate macromonomers of norbornene-terminated PLGA and pegylated biomolecules were copolymerized via ROMP.20 Norbornene-terminated PLGA macromonomer I (NB-PLGA) was first synthesized using ring-opening polymerization (ROP) with norbornenyl-functionalized a…	ACS Mater. Au XXXX, XXX, XXX−XXX https://doi.org/10.1021/acsmaterialsau.2c00079
Crystal Growth. TIPS-P and diF-TIPS-ADT crystals are grown based on vapor diffusion method. The vials containing TIPS-P and diF-TIPS-ADT toluene solution (8 mg mL−1 ) are placed in the methanol baths. The baths are placed at ambient temperature, in a dark state, until the crystals grow to a sufficient size. The crystals are filtered and collected after the growth process. 2D brickwork packing TIP…	Chem. Mater. 2023, 35, 81−93 https://doi.org/10.1021/acs.chemmater.2c02534 '
Synthesis of Cu Nanocubes. CuBr (0.0861 g, 0.6 mmol), TOPO (1.5466 g, 4.0 mmol), and OAm (7.0 mL) were added to a three-neck flask connected to a cooling condenser and stirred at 750 rpm for 30 min at 32 °C in an Ar atmosphere to remove O2. A Teflon tube below the solution level was used for Ar purging. The solution was then heated to 80 °C at a rate of 20 °C/min and was maintained for 15 min. Th…	Chem.Mater.2023,35,136−143 https://doi.org/10.1021/acs.chemmater.2c02828
2.1. Material Syntheses. High-purity dodecane (≥99%), hydrochloric acid 37 wt % (HCl), tetraethylorthosilicate (≥99%, TEOS), and copper(II) chloride dihydrate CuCl2·2H2O were purchased from Sigma-Aldrich. Tetradecyltrimethylammonium bromide (TTAB) was supplied by Alfa Aesar, while dichloromethane (CH2Cl2, ACS-reagent RPE) was purchased from Carlo Erba. All of the chemicals were used as received w…	Chem. Mater. 2023, 35, 228−241 https://doi.org/10.1021/acs.chemmater.2c03022
Pt/C is treated under H2 flow at 300 °C for 30 min. Ru/Pt/C and Fe/Pt/C are prepared by impregnation of Pt/C (after H2 treatment at 300 °C, 100 mg) in a 1:1 mixed solution of 2-propanol and water (100 mL) containing Ru(NO3)2 or Fe(NO3)3 (0.080 mmol, 14.3 at. %metal to Pt). After stirring for 60 min, the solvent is evaporated. The resulting black solid is dried at 353 K for 10 h and then treated u…	ACS Appl. Energy Mater. 2020, 3, 1854−1859
Ru−Ir/C nanoparticle catalysts were prepared using a polyol reduction method with ethylene glycol as a solvent and a reducing agent. The Vulcan XC-72R (75 mg) was dispersed in ethylene glycol (30 mL). The suspension was heated at 170 °C under N2 bubbling, and another ethylene glycol solution containing RuCl3·xH2O and IrCl3 (8 mL) was added dropwise (500 μL/min). The suspension was stirred for 1.5…	ACS Appl. Mater. Interfaces 2020, 12, 22771−22777
Various metal-modified Pt/C samples were prepared by conventional impregnation. Commercial Pt/C (200 mg) and 0.040 mmol metal-modifying precursor were dissolved in a mixed solvent comprising 50 mL each of pure water and isopropanol. The solvent was evaporated, and the residue was dried at 353 K for 10 hours. The resulting black powder was heated at 573 K under H2 flow at 100 mL min−1 for 30 min. …	Chem. Commun., 2019, 55, 3101--3104
Bulk-Membrane Preparation : All bulk membranes were pretreated prior to use. Our pretreatment protocol, described in detail elsewhere, [ 37 ] consisted of boiling bulk membranes in 4 separate solutions for 1 h each, in succession: hydrogen peroxide (3 wt% hydrogen peroxide in water), deionized (DI) water (18 MΩ), sulfuric acid (0.5 M ), and DI water. Membranes were rinsed with DI water following …	Adv. Funct. Mater. 2016, 26, 4961–4975
The carbon-supported Pt/C and Pt3Co=C nanoparticles were prepared using an impregnation method. In a typical synthesis, 53.3 mg of H2PtCl6 _x0001_6H2O and 8.2 mg of CoCl2 _x0001_6H2O were dissolved in deionized water, and 78 mg of Vulcan XC-72 carbon support were dispersed in it. After ultrasonic mixing for 30 min, the suspension was heated under magnetic stirring to allow the solvent to evaporat…	NATURE MATERIALS j VOL 12 j JANUARY 2013 j www.nature.com
A known amount of KMnO4 was dissolved in 100 ml of double distilled water containing 10 ml butyric acid (BA). To this 40 ml of 0.5 M of Na2S2O4 was added drop wise with constant stirring for 20 min. The brown precipitate obtained was centrifuged, washed copiously with double distilled water several times and then with ethanol. It was dried in a vacuum oven around 50 °C overnight	J. Mater. Chem. A, 2013,1, 4300-4306
In a typical procedure, MnCl2•4H2O and NaOH (1:2 in molar) were dissolved in distilled water, respectively. Then NaOH aqueous solution was added to MnCl2 aqueous solution slowly with constant magnetic stirring. The precipitation was filtered and washed several times and then dried at 90°C for 24 h. After being dried, black powder was obtained. 0.1 g of the obtained black powder was mixed with 5 g…	Nanoscale Research Letters 2011, 6:133
We developed a three-step process to incorporate Ni into the RuO2 lattice for Ni-RuO2 catalyst preparation (Methods and Fig. 1a). First, a wet impregnation of metal precursors was adopted on a carbon black support, which was followed by H2/Ar annealing reduction to obtain Ru3Ni nanoparticles supported on carbon black (Ru3Ni/C; Fig. 1b and Supplementary Figs. 1a and 2). The carbon support is impor…	Wu, ZY., Chen, FY., Li, B. et al. Non-iridium-based electrocatalyst for durable acidic oxygen evolution reaction in proton exchange membrane water electrolysis. Nat. Mater. 22, 100–108 (2023). https://doi.org/10.1038/s41563-022-01380-5
Stoichiometric amounts of yttrium nitrate (Y(NO3)3•6H2O, 99.9%, Alfa Aesar, 0.1915 g) and iridium chloride (IrCl3•xH2O, 99.8%, Alfa Aesar, 0.1493 g) were dissolved in 10 mL of deionized water (Barnstead E-Pure, Thermo-ScientificTM) in a 50 mL beaker, followed by addition of citric acid (99%, Fisher Chemical, 0.4203 g). This solution was then heated at 80 °C for 5 h and a stir rate of 400 rpm on a…	ACS Appl. Energy Mater. 2018, 1, 8, 3992–3998
Samples were prepared using hydrothermal synthesis within Teflonlined stainless-steel autoclaves of internal volume ~ 20 mL. For ruthenium-containing materials (Na0.33Ce0.67)2(Ir1xRux)2O7 materials (x > 0), the salts CeCl3·7H2O, RuCl3·xH2O, and IrCl3·yH2O in the required molar ratio based on 0.19 g of the cerium salt, were stirred in 4 mL 5m NaOH solution for 30 min. (The hydration value (x and y…	Sardar, Kripasindhu; Petrucco, Enrico; Hiley, Craig I.; Sharman, Jonathan D. B.; Wells, Peter P.; Russell, Andrea E.; Kashtiban, Reza J.; Sloan, Jeremy; Walton, Richard I. (2014). Water-Splitting Electrocatalysis in Acid Conditions Using Ruthenate-Iridate Pyrochlores. Angewandte Chemie International Edition, 53(41), 10960–10964. doi:10.1002/anie.201406668
For the synthesis of 6H-SrIrO3, Sr(NO3)2 (280 mg) and citric acid (280 mg) were mixed with 5 mL deionized H2O to form the solution 1, and K2IrCl6 (80 mg) was mixed with 4 mL ethylene glycol to form the solution 2. The solution 1 was then stirred into the solution 2 dropwise. The resulting mixture was dried at 150 °C for 12 h to obtain a brown solid product as the precursor, followed by calcinatio…	Yang, L., Yu, G., Ai, X. et al. Efficient oxygen evolution electrocatalysis in acid by a perovskite with face-sharing IrO6 octahedral dimers. Nat Commun 9, 5236 (2018). https://doi.org/10.1038/s41467-018-07678-w
First, 143.4 mg MnBr2·4H2O was added in 300 μl H2O, and then treated with ultrasound until dissolved. The obtained solution was mixed in 500 μl 4 M Mn(NO3)2·4H2O solution. We transferred a volume of 300 μL of the above mixture into 1 mL centrifuge tube. Then, a 2.5 × 2.5 cm2 hydrophilic carbon cloth was placed on a hotplate, 300 μl of the above mixture was dropped on it, followed by calcination o…	Pan, S., Li, H., Liu, D. et al. Efficient and stable noble-metal-free catalyst for acidic water oxidation. Nat Commun 13, 2294 (2022). https://doi.org/10.1038/s41467-022-30064-6
A known amount of KMnO4 was dissolved in 100 ml of double distilled water containing 10 ml butyric acid (BA). To this 40 ml of 0.5 M of Na2S2O4 was added drop wise with constant stirring for 20 min. The brown precipitate obtained was centrifuged, washed copiously with double distilled water several times and then with ethanol. It was dried in a vacuum oven around 50 °C overnight	J. Mater. Chem. A, 2013,1, 4300-4306
Re0.06Ru0.94O2 were synthesized via a molten-salt method. Typically, 5 g NaNO3 and 100 mg NaReO4 were mixed in a 50 mL porcelain cru_x0002_cible. The crucible was transferred to a muffle furnace and heated to 360 °C for 10 min. 40 mg RuCl3·xH2O power was added to the crucible (with lid) and held for 5 min. NO2 brown-color gas was generated when adding RuCl3·xH2O because of oxidation of Ru3+. The …	Nature Communications | (2023) 14:354
In a typical procedure, 0.1721 g of RuCl3 and 0.0656 g of NiCl2·6H2O (that is, RuCl3 and NiCl2 at a molar ratio of 3:1) were mixed in 150 ml of 1 M HCl and sonicated for 2 h. Carbon black (0.4 g; Cabot, BP2000) was then added and dispersed by stirring for 18 h under room temperature to ensure uniform distribution. Next, the mixture was dried by using a rotary evaporator and the remaining powder w…	Nature Materials | Volume 22 | January 2023 | 100–108
Ag and Mn-containing oxides were prepared by the coprecipitation method. AgNO3 and Mn(CH3COO)2·4H2O were used as starting materials. AgNO3 was dissolved in 30 mL distilled water, and 5.9 mL of a 4 mol/L aqueous solution of HNO3 was added. Mn(CH3COO)2·4H2O was dissolved in 30 mL distilled water, and the resulting solution was mixed with the Ag solution. The molar ratios of Ag/Mn (x:1) were adjuste…	ACS Omega 2019, 4, 6, 9763–9768
CuFeO2 crystals were prepared according to our previously hydrothermal procedure for other copper based delafossite oxide, CuCrO2 nanocrystals.22,23 At rst, 15 mmol Cu(NO3)2$3H2O and 15 mmol FeCl2 were dissolved in 70 mL deionized water at room temperature, 2.4–10.4 g NaOH was added to the above solution and stirred for 10 minutes. Aer reaching a homogeneous state, the solution was loaded into …	RSC Adv., 2015, 5, 49280
In this paper, a practical and cost-effective processing route, in situ reactive infiltration technique, was utilized to fabricate magnesium matrix composites reinforced with a network of TiC–TiB2 particulates. These ceramic reinforcement phases were synthesized in situ from Ti and B4C powders without any addition of a third metal powder such as Al. The molten Mg alloy infiltrates the preform of …	Shamekh, Mohammed, Martin Pugh, and Mamoun Medraj. "Processing and Characterization of In Situ (TiC–TiB2) p/AZ91D Magnesium Matrix Composites." Advanced Engineering Materials 15.8 (2013): 708-717.
The following analytical reagents were used in the synthesis of phosphates: NH4H2PO4, (NH4)2HPO4, FeSO4·7H2O, (NH4)2Fe(SO4)2·6H2O, NH4FePO4, CH3COOLi, choline chloride, diethylene glycol, malic acid. For the synthesis of the NH4FePO42H2O, necessary for the production of LiFePO4, we have developed and optimized the procedure for the interaction of ammonium phosphate with ferrous sulfate, in the p…	Galaguz, Vadym A., Sergiy M. Malovanyi, and Eduard V. Panov. "Synthesis of LiFePO4 nanocrystals and their properties as cathodic material for lithium ion batteries." Journal of the Serbian Chemical Society 83.10 (2018): 1123-1129.
A set of ceramic powders has been synthesized using a “bottom-up” approach which is denoted here as the dissolution method. The raw materials were metal powders or minerals. The dissolution media were strong acid or base solutions. In the case of metallic raw materials, magnesium and titanium powders were separately dissolved in hydrochloric acid to obtain their precursors. They were then dried, …	Pratapa, Suminar, et al. "Synthesis of High-Purity Ceramic Nano-Powders Using Dissolution Method." Ceramic Materials-Synthesis, Characterization, Applications and Recycling. IntechOpen, 2018.
SrRuO3 and CaRuO3 epitaxial thin films were grown using a Veeco GEN10 molecular-beam epitaxy system. Strontium and calcium were evaporated from low-temperature effusion cells while an electron beam evaporator was used for ruthenium. All of the elemental source materials—strontium, calcium, and ruthenium—had a purity of 99.99%. Oxidation was achieved using either the output from a commercial ozone…	Nair, Hari P., et al. "Synthesis science of SrRuO3 and CaRuO3 epitaxial films with high residual resistivity ratios." APL Materials 6.4 (2018): 046101.
A solid-state polymerizable monomer, 2,5-dibromo-3,4-propylenedioxythiophene (DBProDOT), was synthesized at 25 °C to produce a conducting polymer, poly(3,4-propylenedioxythiophene) (PProDOT). Crystallographic studies revealed a short interplane distance between DBProDOT molecules, which was responsible for polymerization at low temperature with a lower activation energy and higher exothermic reac…	Kim, Byeonggwan, et al. "Room Temperature Solid‐State Synthesis of a Conductive Polymer for Applications in Stable I2‐Free Dye‐Sensitized Solar Cells." ChemSusChem 5.11 (2012): 2173-2180.
Layered LiCoO2 was synthesized by an oxidation of Co2+ ions in aqueous solutions by lithium peroxide in the presence of excess lithium hydroxide, followed by firing at 400–900°C. The samples were characterized by X-ray diffraction (XRD) and wet-chemical analysis. Although single phase Li1+xCo1−xO2 samples with a Li/Co ratio > 1 could be obtained at lower firing temperatures, they were metastable …	Kim, J., P. Fulmer, and Arumugam Manthiram. "Synthesis of LiCoO2 cathodes by an oxidation reaction in solution and their electrochemical properties." Materials research bulletin 34.4 (1999): 571-579.
(S)-2-Methoxymethyl-1-[2(R)- ethylcycloheptylidenamino]pyrrolidine 4 (2.862 g, 11.34 mmol) was dissolved in dry CH2Cl2 (30 cm³). The reaction was cooled to -78 °C and ozone was passed through the stirred solution for 2 h. The solvent was then removed in vacuo and the product was distilled, using a Vigreux column and a distillation apparatus through which trimethylchlorosilane had been pre-distill…	Synthesis of Medium Ring Ethers. 5. The Synthesis of (+)-Laurencin Jonathan W. Burton, J. Stephen Clark, Sam Derrer, Thomas C. Stork, Justin G. Bendall, and Andrew B. Holmes Journal of the American Chemical Society 1997 119 (32), 7483-7498 DOI: 10.1021/ja9709132
Method A: To a dispersion of copper iodide (23.4 g, 123.0 mmol) in anhydrous Et2O (620 mL) at 0 °C was added MeLi (1.6 M in Et2O, 128 mL, 205.0 mmol), and the mixture was stirred for 1 h. A solution of enone 3 (8.38 g, 41.0 mmol) in Et2O (80 mL) was added dropwise, and the reaction was stirred at 0 °C for 30 min. The reaction was very carefully quenched with saturated aqueous NH4Cl solution and t…	Ben Bradshaw, Gorka Etxebarria-Jardí, and Josep Bonjoch Journal of the American Chemical Society 2010 132 (17), 5966-5967 DOI: 10.1021/ja101994q
To a solution of Na2CO3 (7.22 g, 68.1 mmol) and quinoline (19) (5.87 ml, 50.0 mmol) in THF-H₂O (1:1, 120 ml) at -10 °C was added thiophosgene (3.46 ml, 45.4 mmol) dropwise over 20 min. After stirring for 20 min, NaBH4 (687 mg, 18.2 mmol) was added portionwise. The reaction mixture was quenched with aq HCl and extracted with EtOAc four times. Combined organic extracts were washed with water, sat. …	Yosuke Kaburagi, Hidetoshi Tokuyama, and Tohru Fukuyama Journal of the American Chemical Society 2004 126 (33), 10246-10247 DOI: 10.1021/ja046407b
Lithium titanate was synthesized by solid state reaction with TiO2 and Li2CO3 as precursors [21]. This research used two different commercial grades of anatase TiO2, i.e. Merck, p.a. ICSD#24276 (TiO2-A) and TOSOH ICSD#24276 (TiO2-B). The anatase TiO2 (Merck, p.a.) and Li2CO3 were mixed at mol ratio of 5:2 with zirconia balls as crushers with the weight ratio of material to zirconia balls at 1:30.…	Natalia, Viona et al. “Lithium Titanate (LTO) Synthesis Through Solid State Reaction and Its Performance for LiFePO4/LTO Battery.” Journal of Mathematical and Fundamental Sciences (2018): n. pag.
Synthesis of iCP@X. iCP@X (X = Cl, TFSI) were synthesized with pentachlorocyclopropane and piperazine by a simple rection. Pentachlorocyclopropane (500 mg, 2.33 mmol, 2 equiv), anhydrous piperazine (301 mg, 3.5 mmol, 3 equiv), and triethylamine (590 mg, 5.8 mmol, 5 equiv) were dissolved in CHCl3 (15 mL). The reaction was maintained at room temperature for 4 days under an argon atmosphere. After t…	Yu Wang, Haifeng Ji, Xiaojie Zhang, Jingjing Shi, Xiaona Li, Xiaoxia Jiang, and Xiongwei Qu ACS Applied Materials & Interfaces 2021 13 (14), 16469-16477 DOI: 10.1021/acsami.1c02309
In preparation Li2ZrO3 coating Li4Ti5O12, the Li2ZrO3 coating was performed as follows: 0.043 g of Zr(NO3)4·5H2O and 0.02 g of CH3COOLi·2H2O were separately dissolved in absolute alcohol to obtain solution, respectively. 4.591 g of Li4Ti5O12 powder was ultrasonically dispersed in the CH3COOLi·2H2O solution, then the Zr(NO3)4·5H2O diluted solution was slowly pumped in it for 3 h. The mixture was c…	(2016) Applied Surface Science, 368 , pp. 56-62.
Fabrication of CoCuFe2O4/ZIF-8(Zn) metal organic framework: 100 mg of CoCuFe2O4 nanoparticles were dispersed in 10 mL of methanol with 0.5 ml of CTAB (0.01 mol/L) and sonicated for 1 h. CTAB was used to facilitate loading of ZIF-8(Zn) on the surface of CoCuFe2O4 nanoparticles. Then, zinc nitrate solution (3 mmol of Zn(NO3)2.6H2O in 30 mL of methanol) was added into ferrite so- lution dropwise und…	Firouz Matloubi Moghaddam, Atefeh Jarahiyan, Mahdi Heidarian Haris, Parisa Yaqubnezhad Pazoki, Bagher Aghamiri, High catalytic performance of CoCuFe2O4/ZIF-8(Zn) nanocatalyst for synthesis of new benzimidazole derivatives, Journal of Molecular Structure, Volume 1285, 2023, 135496, ISSN 0022-2860, https://doi.org/10.1016/j.molstruc.2023.135496. (https://www.sciencedirect.com/science/article/pii/S0…
1.5 mL Ac2O was added to 20 mL (50 mg/mL) of STP in batches, and the pH of the reaction solution was adjusted with NaOH solu- tion (1 mol/L) (pH = 9–10). After all the Ac2O addition, the re- action was performed at room temperature for 2 h. After the reac- tion, it was adjusted to neutral with 1 mol/L HCl. Finally, the acety- lated STP (Ac-STP) was obtained by sedimentation, centrifugation, dialy…	Chemical modification and structural analysis of polysaccharide from Solanum tuberdsm Author links open overlay panelWenjian Yang, Gangliang Huang
Chalcopyrite CuInS2 NC Synthesis. The CIS NCs were synthesized based on a protocol reported by De Trizio et al.14 Typically, CuI (0.8 mmol) and In(Ac)3 (0.8 mmol) in 10 mL of DDT were mixed under inert atmosphere and degassed for 1 h at 80 °C. Under N2 atmosphere, the temperature was raised to 210 °C, and after 40 min of reaction, the mixture was cooled down to room temperature. To investigate th…	Chem. Mater. 2018, 30, 2400−2413
In a typical synthesis of host AgZnInS/ZnS NCs with Zn etching, AgDDTC (0.025 mmol), Zn(Ac)2 (0.1 mmol), In(Ac)3 (0.1 mmol), oleic acid (0.5 mL), DDT (0.5 mL) and ODE (4 mL) were added into a 50 mL three-necked round bottom flask equipped with a condenser and a magnetic stir bar. The mixture was heated to 125 °C under vacuum until a clear solution was obtained. Under a flow of nitrogen, the solut…	Lee B, Hegseth T, Song Y, Zhao J, Zhu X. Mn-Doped AgZnInS/ZnS Nanocrystals (NCs): Effects of Zn Etching on the NC Optical Properties. Opt Mater (Amst). 2022;123:111941. doi:10.1016/j.optmat.2021.111941
Synthesis of AgGaS2 NCs. For a typical synthesis of AgGaS2 NCs, AgI (18.8 mg, 0.08 mmol), Ga(acac)3 (59.2 mg, 0.16 mmol), and OAm (6 mL) were mixed together in a 50 mL three-necked flask which was connected to a Schlenk line at 40 °C and then degassed for 1 h by purging with Ar gas under magnetic stirring. Subsequently, the pre-formed S precursor by dissolving S powder (10.25 mg, 0.32 mmol) in a …	Inorg. Chem. 2020, 59, 9, 5975–5982
The preparation of Si-NCs using silicon rich oxide precursors was first introduced by Liu et al. whereby silicon suboxide powders (SiOx, x = 0.4−1.8) were thermally annealed in inert atmosphere at 900 °C.44 After HF etching, freestanding hydride terminated Si-NCs were obtained with a mean diameter of 4.2 nm. This provided a platform for the development of the method described in this paper: the t…	Chem. Mater. 2017, 29, 1, 80–89
Chemical Synthesis of OSHS, OSDS, and OSHB: Heparan sulfate, dermatan sulfate, and heparin by-products were converted to tetrabutylamine salt by a previously reported procedure (29). The resulting salt (100 mg) was dissolved in 2 ml of N,N-dimethylformamide to which 2.3 g of N,N-dimethylformamide·sulfur trioxide complex dissolved in 16 ml of N,N-dimethylformamide was added. After 1 h at 70 °C, th…	Pan J, Qian Y, Zhou X, Lu H, Ramacciotti E, Zhang L. Chemically oversulfated glycosaminoglycans are potent modulators of contact system activation and different cell signaling pathways. J Biol Chem. 2010;285(30):22966-22975. doi:10.1074/jbc.M109.063735
After 1 g STP sufficient dissolution in 80 mL NaOH solution (20%), then 30 mL 4 mol/L of ClCH2COOH solution (isopropanol as solvent) was slowly added slowly. The mixed solution was then placed at 55 °C for 5 h. After the reaction, the mixture was cooled to room temperature and then adjusted to neutral with 1 mol/L HCl. Finally, the carboxymethylated STP (CM-STP) was obtained by precipitation with…	Chemical modification and structural analysis of polysaccharide from Solanum tuberdsm Author links open overlay panelWenjian Yang, Gangliang Huang
General procedure for synthesis of 3-(3,5-diphenyl- 1H-pyrazol-4-yl)−3-(substituted phenyl)propanoic acid 6(a-f) The targeted moieties were synthesized in the pure form without column chromatography. Compound 4-benzoyl-3-(4- substituted phenyl)−5-oxo-5-phenylpentanoic acid 5(a-f) mixed with hydrazine hydrate in a round bottom flask containing ab- solute ethanol and refluxed for 2–3 h, completion …	A new approach for the synthesis of tri-substituted pyrazole propionic acids derivatives: Anti-inflammatory, antimicrobial and molecular docking studies Author links open overlay panelParashuram Gudimani a, Nagashree U Hebbar a, Samundeeswari L Shastri a, Lokesh A. Shastri a, Arun K Shettar b, Joy H Hoskeri c, Shrinivas Joshi d, Vinay A Sunagar
Synthesis of chemosensor JT The intermediate 3-aldehyde-4-hydroxybenzopyranone was synthesized in accordance with literature [48]. The synthesis route of chemical sensor JT is shown in Scheme 1. 4-Hydroxybenzoyl hydrazide (1.0 mmol) was dissolved in 10.0 mL anhydrous ethanol and was added dropwise to the dissolve 3-formyl-4-hydroxycoumarin (1.0 mmol) in 10 mL of ethanol in a flask under magnetic …	A highly selective and sensitive coumarin-based chemosensor for recognition of Al3+ and the continuous identification of Fe3+ in water-bearing system and biomaging & biosensing in Zebrafish Author links open overlay panelYin-Xia Sun a 1, Yue-Hui Jia a 1, Wen-Yu Han a, Yi-Gang Sun a, Jian-Jun Wang b, Zhe-Peng Deng a, Yu Sun c, Lan Yu d
0.19 g (1.66 mmol) (1R,2R)-(-)-Diaminocyclohexane (Aldrich) are dissolved in 10 mL technical ethanol. 0.25 g (0.84 mmol) Zinc nitrate hexahydrate (Sigma-Aldrich) in 5 mL water are slowly added under stirring at room temperature. After slow evaporation at room temperature, crystals appeared after 4 days	Comment on “Crystallographic and theoretical study of the atypical distorted octahedral geometry of the metal chromophore of zinc(II) bis((1R,2R)-1,2-diaminocyclohexane) dinitrate”
Synthesis of 1,1′-((2,5-dimethyl-1,4-phenylene)bis(methylene)) bis(4-carboxypyridin-1-ium) chloride (H2LCl2): 1,4-bis(chloromethyl)−2,5-dimethylbenzene (2.020 g, 10.0 mmol) and 4-picolinic acid (3.075 g, 25.0 mmol) were dissolved in 50 mL DMF in a round-bottomed flask (150 mL), heating under reflux and stirring for 72 h. After cooling down to room temperature, the white solid was isolated via fil…	Sensitive and rapid sensing of dimetridazole in food and environmental samples using a water-stable luminescent zwitterionic Cd(II) metal-organic framework Kaimin Wang a,∗, Yanqiu Dong a, Xiong Zhao a, Keyan Duan a, Ruiting Zhao a, Yanqing Ye a,∗, Jinrong Guo a, Hao Pan b, Huaijun Tang a, Yulu Ma
Synthesis of [Co3(L)2(H2O)6]n: Co(NO3)2·6H2O (58.24 mg, 0.2 mmol), H3L (31.83 g, 0.05 mmol) were dissolved in 5 mL mixed solvent of 1, 4-dioxane (2.5 mL) and H2O (2.5 mL) . Then the mixture was put into a 25 mL Teflon-lined autoclave and heated at 140 °C for 72 h. After the sample gradu- ally cooled to room temperature, pink long strip crystals were ob- tained, and the yield based on H3L was abou…	A pyrazole-functional 3D cobalt-organic framework for fluorescence detection of Cu2+ and Hg2+ Author links open overlay panelYan Xi a, Meng Hu a, Lu Gao b, Qiaona Sun a, Enhui Ma a, Wenjin Hu a, Mengting Li a, Wei Liu a, Jiayin Sun a, Chuanlei Zhang
[Co(μ-phsuc)(μ-obix)]n: A mixture of Co(NO3)2·6H2O (29.1 mg, 1 mmol), phsucH2 (19.5 mg, 1 mmol), obix (23.8 mg, 1 mmol) and NaOH (8.0 mg, 2 mmol) in distilled water (10 mL) was sonicated at ambient tem- perature for 30 min. Then, the reaction mixture was placed in a closed capped bottle (25 mL) and heated at 120 °C for 3 days. Upon cooling to room temperature, the obtained purple crystals were fi…	Syntheses, characterization of three new cobalt(II) complexes with 2-phenylsuccinic acid and flexible bis(imidazole) linkers Figen Arslan Biçer a,∗, Mürsel Arıcı b, Okan Zafer Ye ̧sile
Synthesis of MIEC lithium garnet MIEC lithium-stuffed garnet samples with nominal compositions Li6.2Ga0.2Pr3Zr1.8Nb0.2O12, Li6.4Ga0.2Pr3Zr1.8Ce0.2O12, Li6.4Ga0.2Pr2.5Nd0.5Zr.2O12 and Li6.6Ga0.2Pr3Zr1.8Cr0.2O12 were prepared with a simple solid-state reaction. To prepare these four types of garnet, an appropriate amount of lithium hydroxide monohydrate (10 wt% excess of LiOH⋅H2O was added to compe…	Extreme lithium-metal cycling enabled by a mixed ion- and electron-conducting garnet three-dimensional architecture | Nature Materials
In a 30 ml glass vial, 20 mg Pt(acac)2, 25.6 mg Ni(acac)2, 32 mg W(CO)6 and 135 mg glucose were dissolved in a mixture of 3 ml oleylamine and 2 ml octadecene. The mixture was sonicated for 1 h, and the resulting homogeneous solution was kept at 80 °C for 2.5 h and then heated to 140 °C for another 8 h. After the reaction, the precipitate was centrifuged out at 20,130g and washed by ethanol/hexane…	Amorphous nickel hydroxide shell tailors local chemical environment on platinum surface for alkaline hydrogen evolution reaction | Nature Materials
Large single-crystal ingots of Ag8SnSe6 were synthesized using a vertical Bridgman method32. High-purity Ag, Sn and Se elements (>99.99%) were weighed according to the stoichiometric ratio. The mixture of the starting materials was loaded into a quartz ampoule (25 mm diameter) and flame sealed under vacuum at ~10−3 Pa. The sealed ampoule was placed into a 1,273 K rocking furnace, and sample homog…	Extreme phonon anharmonicity underpins superionic diffusion and ultralow thermal conductivity in argyrodite Ag8SnSe6 | Nature Materials
LiPF6 (151 mg, 1.0 mmol) was dissolved in excess Adpn (4.5 ml, 4.0 mmol) by heating the mixture to 165 °C under an argon atmosphere until it dissolved. The LiPF6 was not soluble in Adpn at room temperature. Upon cooling, crystalline material started to form at ~115 °C, and formation was complete at room temperature. A single crystal was removed from the precipitate for X-ray structure determinati…	A soft co-crystalline solid electrolyte for lithium-ion batteries | Nature Materials
We developed a three-step process to incorporate Ni into the RuO2 lattice for Ni-RuO2 catalyst preparation (Methods and Fig. 1a). First, a wet impregnation of metal precursors was adopted on a carbon black support, which was followed by H2/Ar annealing reduction to obtain Ru3Ni nanoparticles supported on carbon black (Ru3Ni/C; Fig. 1b and Supplementary Figs. 1a and 2). The carbon support is impor…	Non-iridium-based electrocatalyst for durable acidic oxygen evolution reaction in proton exchange membrane water electrolysis | Nature Materials
In a typical procedure, 0.1721 g of RuCl3 and 0.0656 g of NiCl2·6H2O (that is, RuCl3 and NiCl2 at a molar ratio of 3:1) were mixed in 150 ml of 1 M HCl and sonicated for 2 h. Carbon black (0.4 g; Cabot, BP2000) was then added and dispersed by stirring for 18 h under room temperature to ensure uniform distribution. Next, the mixture was dried by using a rotary evaporator and the remaining powder w…	Non-iridium-based electrocatalyst for durable acidic oxygen evolution reaction in proton exchange membrane water electrolysis | Nature Materials
The Pt/Nb alloy catalysts were prepared by the conventional impregnation method, which involved wet impregnation of metal precursors (that is, H2PtCl6 and NbCl5) on the carbon black BP2000 support, followed by H2 reduction at a high temperature of 900 °C. The nominal total metal content was controlled to 20 wt % for all catalysts unless otherwise specified. We initially attempted to prepare the a…	High-Temperature Synthesis of Small-Sized Pt/Nb Alloy Catalysts on Carbon Supports for Hydrothermal Reactions | Inorganic Chemistry (acs.org)
P3-Na0.6(Li0.2Mn0.8)O2 and P3-Na0.6(Li0.2Ti0.2Mn0.6)O2 were synthesized by conventional solid-state synthesis. Stoichiometric amounts of Na2CO3 (>99%, Sigma-Aldrich), Li2CO3 (99.99%, Sigma-Aldrich), MnO2 (>99%, Sigma-Aldrich) and TiO2 (>99%, Sigma-Aldrich) were mixed homogeneously with acetone for 24 h. The resultant mixture was stirred over 12 h at room temperature to evaporate the acetone. The …	Coupling structural evolution and oxygen-redox electrochemistry in layered transition metal oxides | Nature Materials
The synthesis consists of a high-temperature reduction of a tellurium oxide in the presence of hydrazine (N2H4) in a basic aqueous medium35,36,51,52. We followed the hydrothermal growth recipes proposed in the literature36,51. Briefly, we mixed Na2TeO3 (104 mg) and polyvinylpyrrolidone (average molecular weight, 360,000; 547.9 mg) in 33 ml of MilliQ water by magnetic stirring to achieve a clear s…	Gate-tuneable and chirality-dependent charge-to-spin conversion in tellurium nanowires | Nature Materials
Polycrystalline samples of Ba–Li oxyhydrides were synthesized by two different solid-state reactions. In one case, a mixture of BaH2, BaO and LiH was sintered at 650 °C and 2 GPa using a cubic anvil-type cell (high-pressure synthesis), while in the other case, the same mixture was sintered in a stainless steel tube filled with H2 gas (ambient-pressure synthesis). Room-temperature synchrotron X-ra…	Hydride-ion-conducting K2NiF4-type Ba–Li oxyhydride solid electrolyte | Nature Materials
Purified and untreated materials with the nominal compositions NaxSn0.995–xSe (x = 0.01–0.03) and SnSe as a reference were synthesized by reacting stoichiometric mixtures of proper starting reagents. They were loaded in carbon-coated and evacuated fused-silica tubes (roughly 10–4 Torr), and were heated at 1,223 K for 12 h, followed by quenching to ice water. The obtained ingots were further annea…	Polycrystalline SnSe with a thermoelectric figure of merit greater than the single crystal | Nature Materials
VBr3 and VI3 were grown in evacuated quartz sealed tubes by reacting elementary vanadium (vanadium powder, −325 mesh, 99.5%, Alfa Aesar), iodine (99+%, Alfa Aesar) and purified bromine (Sigma-Aldrich) with a slight excess of halide. Because bromine is a liquid, the tube was placed in a liquid nitrogen bath to freeze the bromine before being evacuated and quickly flame-sealed. The tubes were place…	Extending insertion electrochemistry to soluble layered halides with superconcentrated electrolytes | Nature Materials
To synthesize the RbAg3Se2 and CsAg3Se2 ternary compounds, A2Se3 (A = Rb or Cs), Ag and Se powders were homogenized in a mortar and pestle in a 1:6:1 molar ratio, loaded into a graphite crucible and capped with a graphite plug before being flame-sealed in a fused-silica tube with a 15 mm outer diamter and 13 mm inner diameter. These mixtures were heated to 400 °C in 3 h and held for 12 h before t…	A two-dimensional type I superionic conductor | Nature Materials
The synthesis was carried out as reported elsewhere40, with slight modifications14. Bi2O3 (10.0 g, 21.5 mmol) was mixed with trifluoroacetic acid (10 ml, 139 mmol) and trifluoroacetic anhydride (20 ml, 139 mmol) in a three-neck flask, connected to a Schlenk line, and stirred under N2 atmosphere at 60 °C for 24 h. The oxide fully dissolved, forming a viscous, brownish solution. The solvents were e…	Thermal synthesis of conversion-type bismuth fluoride cathodes for high-energy-density Li-ion batteries | Communications Chemistry (nature.com)
The as-synthesized Bi(TFA)3 (3.30 g, 6.03 mmol) was added inside an N2-filled glovebox (O2, H2O < 0.1 ppm) to an alumina crucible and placed into a silica quartz tube that was fused on one side and open on the other. The open end was then sealed with a valve and transferred into a tube furnace. The valve was used to release the gaseous decomposition products. The sample was heated under N2 flow f…	Thermal synthesis of conversion-type bismuth fluoride cathodes for high-energy-density Li-ion batteries | Communications Chemistry (nature.com)
O3-NaCoO2 was synthesized using a conventional solid-state method. Stoichiometric amounts of Co3O4 (Aldrich, 99.5%, nanopowder) and Na2O2 (Aldrich, 97%) were mixed thoroughly by a Spex Mixer/Mill 8000M for 90 min. The precursors were then pressed into pellets before annealing at 450 °C for 16 h under flowing oxygen. P3’-Na0.67CoO2 was prepared by chemically desodiating O3-NaCoO2. Stoichiometric a…	The interplay between thermodynamics and kinetics in the solid-state synthesis of layered oxides | Nature Materials
LIO, LISO25 and LISO50 were synthesized by solid-state reactions. Appropriate amounts of Li2CO3 (Alfa Aesar, 99.998% metal basis), IrO2 (Alfa Aesar, 99.99% metal basis) and SnO2 (Alfa Aesar 99.9% metal basis) were mixed using a planetary ball mill. A 10% excess of Li2CO3 was used to compensate the lithium evaporation at high temperature. Mixed powder was heat treated at 1000 °C for 12 h twice in …	Metal–oxygen decoordination stabilizes anion redox in Li-rich oxides | Nature Materials
TiO1.12F0.40(OH)0.48 was synthesized using a mild solvothermal process described in our previous report20. Briefly, a solution containing 1.2 ml of HF and 24.8 ml of isopropanol was added to 4 ml of titanium isopropoxide in a 45 ml Teflon line container with a fixed ratio of F/Ti setting at 2. After sealing, the solution was heated at 90 °C for 12 h. After cooling down to room temperature, the wh…	Reversible magnesium and aluminium ions insertion in cation-deficient anatase TiO2 | Nature Materials
β-Li2IrO3 was prepared from IrO2 (Sigma Aldrich, 99.9%) and Li2CO3 (Sigma Aldrich, 99.0%) with 20% excess. The reactants were mixed by ball-milling for 30 min, pelletized and fired at 1,000 °C for 86 h under O2 atmosphere.	Evidence for anionic redox activity in a tridimensional-ordered Li-rich positive electrode β-Li2IrO3 | Nature Materials
The powder samples of Na3−2xSc2(PO4)3:xEu2+ with a range of 0.01 ≤ x ≤ 0.07 were prepared using a solid-state method. Starting materials consisting of stoichiometric amounts of Na3PO4 (Aldrich, 96.0%), Sc2O3 (Kojundo, 99.9%), NH4H2PO4 (Junsei, 99.0%) and Eu2O3 (Kojundo, 99.9%) were ground in agate mortar, placed in alumina crucibles, and fired at 350 °C for 1 h in a muffle furnace. The samples we…	A zero-thermal-quenching phosphor | Nature Materials
Li0.5−3xNd0.5+xTiO3 samples were synthesized via solid-state reaction from high purity (>99.9%) Nd2O3, TiO2, and Li2CO3 powders, with the details presented elsewhere20. STEM samples were prepared by crushing the synthesized material into fine powders and dispersing them onto holey carbon-coated Cu grids using ultrahigh purity, analytical reagent ethanol.	Direct mapping of Li-enabled octahedral tilt ordering and associated strain in nanostructured perovskites | Nature Materials
All compounds were synthesized by solid-state mechanochemical reactions. Stoichiometric mixtures of Li2S (99.9%, Zhejiang FunLithium New Energy Technology Co., Ltd.), As2S3 (99.9%, Innochem), Si (99.99%, Macklin), LiI (99.95%, Innochem), and elemental sulfur (99.95%, Innochem) were weighed with a total mass of 1 g in an Ar-filled glovebox (O2 < 0.1 ppm, H2O < 0.1 ppm). These mixtures were placed …	Realizing long-cycling all-solid-state Li-In||TiS2 batteries using Li6+xMxAs1-xS5I (M=Si, Sn) sulfide solid electrolytes | Nature Communications
Polycrystalline tin selenide (SnSe) was synthesized by solid-state reaction. The synthesis method employed follows methods outlined in the literature50,51,52. In detail, fused silica tubes containing a 1:1 stoichiometric ratio of metallic tin and selenium shot were sealed under vacuum. Throughout the sealing process, the temperature of the outside surface of the silica tubes was controlled to lim…	The curious case of the structural phase transition in SnSe insights from neutron total scattering | Nature Communications
Unless otherwise noted, all procedures were performed under inert atmosphere. The synthetic scheme is outlined in Fig. 1a. The parent phase Sr2MnO2Cu1.5S2 was prepared by the reaction between SrS (2 equivalents) (obtained by reacting SrCO3 (Alfa 99.994%) with CS2 (Aldrich 99%) carried by flowing argon in a tube furnace in a fume cupboard (caution: CS2 is highly toxic and flammable)), MnO2 (Aldric…	Anion redox as a means to derive layered manganese oxychalcogenides with exotic intergrowth structures | Nature Communications
HNSEs were prepared by the mechanochemical reaction of LiCl (or NaCl) and ZrCl4 with Li2O (or Na2O) (Fig. 1a). Li2O acts as an oxygen source and reacts with ZrCl4 to form ZrO2 nanoparticles50, and the residual ZrCl4 and LiCl react to produce Li2ZrCl6. Based on DFT calculations, the reaction to generate ZrO2 and LiCl from ZrCl4 and Li2O has a strong driving force (Supplementary Table 1, Supplement…	Boosting the interfacial superionic conduction of halide solid electrolytes for all-solid-state batteries | Nature Communications
Overall, 63 mmol of TriMOS (7.7 g) was weighed out in a nitrogen-filled glovebox and transferred immediately into a 100-mL Schlenk flask equipped with magnetic stirring under a nitrogen atmosphere. The flask was then soaked in an ice bath to reduce the temperature to ~0 °C. 0.4 mmol of CoCl2·6H2O (100 mg), 10 mL of dilute nitric acid (0.9 mmol), and 10 mL of methanol (25 mmol) were then added int…	Epitaxially grown silicon-based single-atom catalyst for visible-light-driven syngas production | Nature Communications
To synthesize garnet-type solid electrolyte Li6.25Al0.25La3Zr2O12 (LLZO) Li2CO3 (>99.0%, Sigma-Aldrich), La(OH)3 (99.9%, Sigma-Aldrich), Al2O3 (99.8%, abcr), and ZrO2 nano-powder (<100 nm, Sigma-Aldrich) were mixed in a stoichiometric ratio. This mixture was then ball-milled for 12 h at 350 rpm under pure oxygen atmosphere. After milling, the homogenized powder was pressed into large pellets in M…	Understanding the evolution of lithium dendrites at Li6.25Al0.25La3Zr2O12 grain boundaries via operando microscopy techniques | Nature Communications
ZIF-4 (Zn(im)2, cag topology), ZIF-zni (Zn(im)2, zni topology), ZIF-62 (Zn(im)1.65(bim)0.35, cag topology) and TIF-4 (Zn(im)1.68(mbim)0.32, cag topology) were synthesized solvothermally reproducing or adapting established procedures30. Solvent molecules were removed from the materials at 200 °C under a dynamic vacuum yielding the activated (solvent-free) compounds. The phase purity of the crystal…	Quantification of gas-accessible microporosity in metal-organic framework glasses | Nature Communications
The synthesis routes for ZIF-4 (chemical composition (Zn(im)2) and ZIF-62 (chemical composition Zn(im)1.65(bim)0.35) were reproduced as stated in our previous publication30. Zn(NO3)2·6H2O (4.0 mmol) and either only imidazole (13.2 mmol; for ZIF-4) or imidazole and benzimidazole (11.55 mmol imidazole, 1.66 mmol benzimidazole; for ZIF-62) were dissolved in 90 mL N,N-dimethylformamide (DMF). The obt…	Quantification of gas-accessible microporosity in metal-organic framework glasses | Nature Communications
Garnet solid electrolytes were synthesized through the solid-state reaction. Accordingly, the precursors of La2O3 (99.9 %, Thermo Fisher Scientific), ZrO2 (99.9%, Thermo Fisher Scientific), HfO2 (99.9%, Thermo Fisher Scientific), SnO2 (99.99, Sigma Aldrich), Sc2O3 (99.9%, Thermo Fisher Scientific), Ta2O5 (99.85%, Thermo Fisher Scientific), and Nb2O5 (99.9%, Thermo Fisher Scientific) were used in …	Unlocking the hidden chemical space in cubic-phase garnet solid electrolyte for efficient quasi-all-solid-state lithium batteries | Nature Communications
SnS2 was grown via a CVD method by using sulfur powder (S, 99.5%, Sigma-Aldrich), tin dioxide (SnO2, 99.99%, Alfa), and potassium iodide (KI, 99.998%, Alfa) as precursors. Specifically, 10 mg SnO2 and 1 mg KI powder were placed at the center of the furnace with a SiO2/Si substrate on the top. 200 mg S was placed in an alumina boat upstream. The temperature of the furnace firstly ramped up to 600 …	Single atom catalysts in Van der Waals gaps | Nature Communications
The SnS2/rGO hybrid nanostructure was achieved by a one-pot hydrothermal reaction using stannic chloride pentahydrate (SnCl4·5H2O, 98%, Sigma-Aldrich), thiourea (CH4N2S, 99%, Acros) and graphene oxide (GO, Nanjing Xianfeng Nano) as precursors. Specifically, 20 mg GO was added to 20 mL of deionized water (DI) and sonicated for 2 h. Then, 130 mg SnCl4·5H2O and 320 mg CH4N2S were poured into the sol…	Single atom catalysts in Van der Waals gaps | Nature Communications
The SA-intercalated SnS2/rGO (SA: Cu, Ni, Pd, Pt) can be synthesized according to the above intercalation method. Typically, 40 mg SnS2/rGO was firstly dispersed in a 15 mL acetone solution in a 20 mL vial. Then, 3 mg ammonium hexachloroplatinate (IV) and 5 mg glucose, 3 mg ammonium tetrachloropalladate (II) and 5 mg ascorbic acid, 3 mg nickel(II) chloride and 5 mg sodium borohydride, 3 mg tetrak…	Single atom catalysts in Van der Waals gaps | Nature Communications
AlMC-1 to AlMC-7 were synthesized by mixed Al(OiPr)3 (6 mmol), benzoic acid (3 mmol), HNO3 (60–100 μL) in 8–10 mL alcohols solvent (HOEt or HOnPr). The trace of HNO3 plays an important role in the formation of the Al24 cages. Its use should be controlled between 60 and 100 μL in this reaction. Besides, the addition of extra guests greatly affects the supramolecular assembly of Al24 cages, such as…	Water-stable porous Al24 Archimedean solids for removal of trace iodine | Nature Communications
n this work, Cu-HHTP films were assembled on the functionalized substrates with LPE LBL autoarm immersion method by sequentially immersing Cu(OAc)2 and HHTP solutions (Fig. 1 top). Between each step, the samples were washed to remove the unreacted reactants. Note that two oriented Cu-HHTP films along [001]- and [100]-orientations were prepared by changing the types of solvents and reaction temper…	Electrically regulating nonlinear optical limiting of metal-organic framework film | Nature Communications
The 4-iodocinnamic acid was synthesized before the preparation of 4I-CASS, 4I-CACS, and 4I-CAHCS. The synthetic procedure of 4-iodocinnamic acid is shown in Supplementary Fig. 22. Malonic acid (3.12 g, 30.0 mmol) and piperidine (6 mmol) were added to a solution of 4-iodobenzaldehyde (4.64 g, 20.0 mmol) in pyridine (80 mL). The reaction mixture was refluxed for 4 h. After the reaction was complete…	Biferroelectricity of a homochiral organic molecule in both solid crystal and liquid crystal phases | Nature Communications
For the synthesis of 4I-CASS (Supplementary Fig. 23), β-sitosterol (2.76 g, 5 mmol, 75%), 4-iodocinnamic acid (1.37 g, 5 mmol), DMAP (2.20 g, 18 mmol), and dicyclohexylcarbodiimide (3.09 g, 15 mmol) were added to a closed pressure-resistant bottle with 45 mL dichloromethane, and the mixture was stirred at 90 °C. After 48 hours, the resultant mixture was returned to room temperature, filtered, and…	Biferroelectricity of a homochiral organic molecule in both solid crystal and liquid crystal phases | Nature Communications
In the synthesis system of CNM, the cleaned FTO layer coated on the substrate can act as seeds leading to the effective attachment of a NiMoO4 film on the substrate. L/D-Serine was chosen as both the symmetry-breaking agent and the structure-directing agent for asymmetric attachment and co-self assembly with Ni2+ ions owing to the strong chelation between carboxyl groups and Ni2+ ions. Subsequent…	Synchronous quantitative analysis of chiral mesostructured inorganic crystals by 3D electron diffraction tomography | Nature Communications
In the synthesis process of CTD, the tin dioxide coated on the FTO substrate could be considered as a crystal seeds layer. L-Ammonium tartrate served as chiral symmetry-breaking agent due to its strong coordinating ability between carboxyl group and divalent tin ions. The synthesis was performed in water by using SnCl2·2H2O and Na3C6H5O7·2H2O as an inorganic precursor and chelate stabiliser, resp…	Synchronous quantitative analysis of chiral mesostructured inorganic crystals by 3D electron diffraction tomography | Nature Communications
Single crystal of Cs3Bi2I6Cl3 was grown using a Bridgman furnace by using stoichiometric amount of CsCl and BiI3. The vacuum-sealed ampule kept at 750 °C for 48 h and then moved through a temperature gradient from 600 to 480 °C at a speed of 1 mm/h. Finally, the sample was slowly cooled to room temperature in 120 h.	Glassy thermal conductivity in Cs3Bi2I6Cl3 single crystal | Nature Communications
Solvothermal reactions of PbX2 (X = Br−/I−), NH2-bdc and perchloric acid in DMF/EtOH afforded the brown plate-like crystals of [Pb2X]3+(NH2-bdc)2 • G (X = Br−/I−, G = guest: (CH3)2NH2+, TMOF-10-NH2(Br) and TMOF-10-NH2(I), TMOF = Tongji MOF) (Supplementary Fig. 1). Perchloric acid performs as an inorganic acid to regulate the synthetic pH and a crystallization stabilizer, which is analogous to the…	Bromo- and iodo-bridged building units in metal-organic frameworks for enhanced carrier transport and CO2 photoreduction by water vapor | Nature Communications
A mixture of 0.2305 g PbI2 (0.5 mmol), 0.2715 g 2-aminoterephthalic acid (1.50 mmol), 200 μL perchloric acid (HClO4, 2.42 mmol), and 4 mL mixed solvent of DMF and EtOH (VDMF: VEtOH = 2: 1) were added into a 10 mL Teflon-lined autoclave reactor. The autoclave was then sealed into a stainless steel vessel and heated at 150 °C for 72 h. After cooling to room temperature, brownish plate-like crystals…	Bromo- and iodo-bridged building units in metal-organic frameworks for enhanced carrier transport and CO2 photoreduction by water vapor | Nature Communications
In a typical synthesis, 60 mg of as-prepared TMOF-10-NH2(I) was fully dispersed in 10 mL DMF solution, and 0.2–1 mL Ru NPs solution (Ru: DMF = 2.0, 4.8, and 9.1 v/v%) was added under vigorous stirring, followed by sonication for 30 min. Then, the mixture was incubated at room temperature for 12 h. The gray precipitates were separated by centrifugation (5500 rpm for 2 min), washed with EtOH for th…	Bromo- and iodo-bridged building units in metal-organic frameworks for enhanced carrier transport and CO2 photoreduction by water vapor | Nature Communications
ZIF-65(Zn) was synthesized using a modification of the method published by Yaghi et al.15. Zinc acetate dehydrate [0.110 g, 0.5 mmol] and 2-nitroimidazole (nIm) [0.141 g, 1.25 mmol] were added to dimethylformamide (DMF) [15 mL] in a 30 mL Teflon-lined autoclave and heated at 100 °C for 48 h. The as-synthesized sample was labeled as ZIF-65(Zn)-I.	Large breathing effect in ZIF-65(Zn) with expansion and contraction of the SOD cage | Nature Communications
ZIF-65(Zn)-II was obtained via MeOH exchange and activation of the as-synthesized sample. ZIF-65(Zn)-III can be obtained by adsorbing specific guest molecules in ZIF-65(Zn)-II. Typically, ZIF-65(Zn)-III·(n-C10) was formed by immersing the ZIF-65(Zn)-II sample in n-C10. ZIF-65(Zn)-III·(n-C4OH) was formed via n-C4OH vapor adsorption in ZIF-65(Zn)-II. ZIF-65(Zn)-I (Cubic I-43m) was synthesized using…	Large breathing effect in ZIF-65(Zn) with expansion and contraction of the SOD cage | Nature Communications
Synthesis of Na1+xZr2SixP3−xO12 for x = 1.5 and x = 2.0 were carried out using a sol–gel method with NaNO3 (Alfa Aesar, 99%), NH4H2PO4 (Sigma Aldrich, 98%), ZrO(NO3)2.xH2O (Alfa Aesar, 99%), Si(OC2H5)4 (Tetraethyl orthosilicate/TEOS, Rectapur, 99%) and citric acid (Alfa Aesar, >99%) as precursors followed by carefully optimized thermal treatments. Citric acid was first mixed with 300 mL of ethano…	Fundamental investigations on the sodium-ion transport properties of mixed polyanion solid-state battery electrolytes | Nature Communications
NaVPO4F was synthesized by means of a solid-state ion-exchange approach in two steps. First, a NH4VPO4F precursor was obtained using a hydrothermal route according to the reaction (1). For this, sodium carboxymethylcellulose (0.200 g) was dissolved in distilled H2O (22 ml) under heating with vigorous stirring. The resulting solution was cooled down to room temperature. Then VOSO4 × 3H2O (1.0857 g…	Development of vanadium-based polyanion positive electrode active materials for high-voltage sodium-based batteries | Nature Communications
The K2x/3CuII[FeIIxFeIII1−x(CN)6]2/3□1/3·xH2O (Cu[Fe]2/3) was synthesised via reported precipitation method5,6. 120 ml of 0.2 M CuSO4 was introduced dropwise to a vigorously stirring 120 ml of 0.1 M K3Fe(CN)6. After 6 h of reaction, the precipitate was washed and centrifuged multiple times and dried in an oven at 60 °C for 12 h. The exact composition of Cu[Fe]2/3 is K0.32Cu[Fe(CN)6]0.63·nH2O, whe…	Exploration of glassy state in Prussian blue analogues | Nature Communications
Piezoceramics with nominal composition (0.97-x)K0.50Na0.50Nb0.965Sb0.035O3-0.03(Bi0.5Na0.5)0.9(Ga0.5Li0.5)0.1ZrO3-xBiFeO3 (x = 0, 0.002, 0.004, 0.005, 0.006, 0.007 and 0.008) were synthesized using the solid-state reaction route. Raw chemicals Na2CO3 (99.8%, Sinopharm, China), K2CO3 (99%, Sinopharm, China), Li2CO3 (98%, Sinopharm, China), Nb2O5 (99.5%, Sinopharm, China), Sb2O3 (99%, Sinopharm, Ch…	Deciphering the phase transition-induced ultrahigh piezoresponse in (K,Na)NbO3-based piezoceramics | Nature Communications
Figure 1a illustrates the simple preparation process for the Rh1/NC catalysts. In the first step, a urea solid was melted into a liquid at 150 °C, and then, poly-(ethylene glycol) (PEG) and RhCl3 were added to the urea liquid (Supplementary Fig. 1). A uniform mixed solution was formed after stirring for 5 min. In the second step, the mixed solution was poured into a crucible and pyrolyzed at 900 …	Kinetically restrained oxygen reduction to hydrogen peroxide with nearly 100% selectivity | Nature Communications
In a typical procedure, 5 g urea was added to a vial (volume, 20 mL) and heated at 150 °C to melt it into a transparent liquid, followed by the addition of 200 mg PEG 4000 under stirring. PEG 4000 was dissolved in liquid urea within 1 min to form a clear solution. Then, 0.005 mmol RhCl3 was added and stirred for 5 min. The mixture solution was poured into an alumina crucible, pyrolyzed in a tube …	Kinetically restrained oxygen reduction to hydrogen peroxide with nearly 100% selectivity | Nature Communications
In a typical procedure, 2 g PEG 4000 was added to a vial (volume, 20 mL) and heated at 100 °C to melt it into a transparent liquid. Then, 0.1 mmol Rh(acac)3 was added and stirred for 5 min. The mixture solution was poured into an alumina crucible, pyrolyzed in a tube furnace under a N2 atmosphere at 900 °C for 2 h with a heating rate of 2 °C min−1, and then naturally cooled to room temperature. R…	Kinetically restrained oxygen reduction to hydrogen peroxide with nearly 100% selectivity | Nature Communications
HAP crystals with a dimension of ~50 µm were prepared via a reported procedure35 with slight modifications. Ni(NO3)2·6H2O (0.032 g, 0.11 mmol), 1,3,5-benzene tricarboxylic acid (H3BTC, 0.021 g, 0.10 mmol), and AP (0.028 g, 0.15 mmol) were dissolved in a mixture of DMF/MeOH (19 mL, 10:9 ratio). The solution was heated in a tightly sealed 30 mL vial at 60 °C for 15 h to form yellowish green hexagon…	Spatial distribution modulation of mixed building blocks in metal-organic frameworks | Nature Communications
Approximately 100 mg of HAP crystals were added to 20 mL 0.3 M BE–DMF solution in a 30 mL vial. The vial was tightly sealed and stored in a 100 °C oven for 2 days. The solution containing the HAP crystals was refreshed once with 20 mL fresh 0.3 M BE–DMF solution during soaking.	Spatial distribution modulation of mixed building blocks in metal-organic frameworks | Nature Communications
Among the reported metal sulfide ion exchangers, K2xMnxSn3−xS6 (x = 0.5–0.95, KMS-1) and KInSn2S6 (KMS-5) have shown excellent acid resistance (retaining the parent structure at pH <1)8,17,21. A common feature of both compounds is the high coordination number of metal ions in the framework (i.e., metal ions are coordinated with six S atoms to form octahedral geometries), which is the highest amon…	Highly selective cesium(I) capture under acidic conditions by a layered sulfide | Nature Communications
A series of SIFSIX-dps-Zn variants, SIFSIX-dps-Cu (SIFSIX = SiF62−, dps = 4.4′-dipyridylsulfide, termed as NCU-100), GeFSIX-dps-Cu (GeFSIX = GeF62−), and NbOFFIVE-dps-Cu (NbOFFIVE = NbOF52−) were successfully prepared through solution reactions (Fig. 1a, see Supplementary Information for synthetic and crystallographic details). Crystal structures of the as-synthesized MOFs were determined by sing…	Fine pore engineering in a series of isoreticular metal-organic frameworks for efficient C2H2/CO2 separation | Nature Communications
The sample was prepared according to ref. 39, and reproduced here for completeness. A methanol solution (5.0 ml) of dps (0.054 g, 0.286 mmol) was slowly added to an aqueous solution (5.0 ml) of Cu (BF4)2·xH2O (0.066 g, 0.26 mmol) and (NH4)2SiF6 (0.046 g, 0.26 mmol) at room temperature, the mixture was kept undisturbed at room temperature for 48 h. Then the purple powder was washed with methanol a…	Fine pore engineering in a series of isoreticular metal-organic frameworks for efficient C2H2/CO2 separation | Nature Communications
All commercially available reagents were analytical (AR) grade and purchased without further purification. Single-phase is polycrystalline [(CH3)2CHCH2NH3]2PbCl4 was synthesized from an aqueous solution comprising of iso-butylamine, Pb(CH3COO)2·3H2O, in a ratio of 1:1 in concentrated hydrochloric acid at ambient temperature. First, 1.14 g Pb(CH3COO)2·3H2O (3 mmol) were slowly added into 20 mL hyd…	Giant room temperature electrocaloric effect in a layered hybrid perovskite ferroelectric: [(CH3)2CHCH2NH3]2PbCl4 | Nature Communications
Honeycomb layered oxide samples with nominal compositions Na2–xKxNi2–yCoyTeO6 (0 ≤ x ≤ 2; y = 0, 0.25, 0.5, 0.75 and 1) were prepared through high-temperature solid-state reaction routes. Stoichiometric amounts of CoO (Sigma Aldrich/High Purity Chemicals), NiO (Kojundo Chemical Laboratory (Japan), purity of 99%), TeO2 (Aldrich, purity of ≥99.0%), Na2CO3 (Chameleon Reagent) and K2CO3 (Rare Metalli…	Mixed alkali-ion transport and storage in atomic-disordered honeycomb layered NaKNi2TeO6 | Nature Communications
Polycrystalline V2O5 thin films were fabricated on glass substrates with a conductive F-doped SnO2 (FTO) coating via a simple electrodeposition process. VOSO4·nH2O (Alfa Aesar, 99.9%) and a mixture of high-purity ethanol and deionized water (50:50 by vol%) were used to prepare the 0.5 M electrolyte solution for the deposition. The film fabrication was carried out at room temperature in the soluti…	Atomic-scale unveiling of multiphase evolution during hydrated Zn-ion insertion in vanadium oxide | Nature Communications
Li2ZrCl6 were synthesized from LiCl (Alfa Aesar, 99.9%) and ZrCl4 (Acros Organics BVBA, 98%). The stoichiometric amount of the starting materials were mechanochemically milled in the WC pot using WC balls (5 mm diameter) with a ball-to-powder mass ratio of 10:1. The milling was performed in a planetary mill (FRITSCH, Pulverisette 7 premium line) at 500 rpm for 45 h. Such milling directly yields t…	A cost-effective and humidity-tolerant chloride solid electrolyte for lithium batteries | Nature Communications
Germanium dioxide (54 mg, 0.52 mmol), copper acetate hydrate (50 mg, 0.25 mmol), selenium powder (240 mg, 3.04 mmol), potassium sulfide (90 mg, 0.82 mmol), DBU (2.00 mL), (±)-2-amino-1-butanol (1.00 mL) and deionized water (1.00 mL) were mixed in a 25 mL Teflon-lining stainless steel and stirred for 30 min, then heated to 180 °C for 9 days. After cooled down to room temperature, all the products …	A chalcogenide-cluster-based semiconducting nanotube array with oriented photoconductive behavior | Nature Communications
Seven functionalized MOF-5 derivatives of the general chemical composition Zn4O(CX-bdc)3 (CX-bdc2– = 2,5-dialkoxy-1,4-benzenedicarboxylate with X = 2–8: number of carbon atoms in the alkyl chain, Fig. 1e), bearing linear alkoxy groups of variable length at the organic bdc2– linker, were prepared as transparent cubic crystals (size ~100–500 µm), denoted as-MOF-5-CX. Repeated solvent exchange with …	Frustrated flexibility in metal-organic frameworks | Nature Communications
KNO3 (aladdin, 99.5%), Ba(NO3)2 (aladdin, 99.5%), K2CO3 (aladdin, 99.0%), B2O3 (aladdin, 99.9%) and H3BO3 (aladdin, 99.5%) were used as received. Single crystals of K5Ba2(B10O17)2(BO2) were grown by the high-temperature solution method. A mixture of KNO3 (0.379 g, 3.75 mmol), Ba(NO3)2 (0.392 g, 1.50 mmol), and B2O3 (0.548 g, 7.87 mmol) were loaded into a platinum crucible. The crucible was heated…	Expanding the chemistry of borates with functional [BO2]− anions | Nature Communications
The bulky Co-MOF, [CoL(H2O)2]·0.5H2O (H2L = 5-(1H-1,2,4-triazol-1-yl)isophthalic acid), was synthesized via a solvothermal reaction of CoCl2·6H2O and H2L in DMF/H2O at 130 °C for 72 h (see the Methods for details). Single-crystal X-ray diffraction analyses reveal that Co-MOF crystallizes in a monoclinic crystal system with a space group of C2/c (Supplementary Table 1). As shown in Fig. 1a, the as…	Facile electron delivery from graphene template to ultrathin metal-organic layers for boosting CO2 photoreduction | Nature Communications
In a 10-mL Teflon-lined autoclave, CoCl2·6H2O (18.0 mg) and 5-(1H-1,2,4-triazol-1-yl)isophthalic acid (9.0 mg) were dissolved in a mixed solvent containing 1.75 mL DMF, 0.5 mL water, and 0.25 mL acetic acid. After a 12-h reaction under 130 °C, this mixture afforded violet crystals of Co-MOF, which were cleaned by water and ethanol, followed by drying at 60 °C.	Facile electron delivery from graphene template to ultrathin metal-organic layers for boosting CO2 photoreduction | Nature Communications
In a 20-mL Teflon-lined autoclave, Cd(CH3COO)2·2H2O (30.0 mg) and 5-(1H-1,2,4-triazol-1-yl)isophthalic acid (24.0 mg) were dissolved in a mixed solvent containing 2.0 mL water and 0.4 mL acetic acid. After a 24-h reaction under 180 °C, this mixture afforded colorless crystals of Cd-MOF, which were cleaned by water and ethanol, followed by drying at 60 °C.	Facile electron delivery from graphene template to ultrathin metal-organic layers for boosting CO2 photoreduction | Nature Communications
The first step is the immobilization of Co2+ on the 2D GO nanosheets. The GO was synthesized according to previous report46,47. Then, 20 mg GO and 0.5 mL water were added into 25 mL ethanol to obtain a homogeneous suspension after 1 h of ultrasonic treatment. Then, 0.1, 0.3, 0.5, or 1.0 mL aqueous solution of CoCl2·6H2O (0.1 M) was added into this GO suspension. After reaction at 80 °C for 24 h, …	Facile electron delivery from graphene template to ultrathin metal-organic layers for boosting CO2 photoreduction | Nature Communications
The polycrystalline sample of PHTO was synthesized by a solid state reaction under high pressure of 6 GPa and high temperature of 1273 K. The starting materials HgO (Aldrich, 99.0% pure), PbO (Alfa, 99.995% pure) and TiO2 (Alfa, 99.995% pure) were mixed homogenously in a molar ratio 1:3:4 and pressed into a pellet with diameter of 6 mm in an argon gas protected glove box with oxygen and H2O level…	A combinatory ferroelectric compound bridging simple ABO3 and A-site-ordered quadruple perovskite | Nature Communications
All FexOy and MnxOy materials were purchased from Sigma-Aldrich. The electrode pellets that contain 70 wt% MxOy active material, 10 wt% PTFE and 20 wt% Super P carbon (TIMCAL C65) were prepared in the atmosphere. Swagelok-type in situ cells were assembled in Ar-filled glovebox (MBraun) using the as-prepared electrode pellets with a glass fibre (Whatman) as the separator, an Li metal foil as the c…	Non-equilibrium metal oxides via reconversion chemistry in lithium-ion batteries | Nature Communications
Sr2V2O7 was prepared by solid state reactions. Stoichiometric mixtures of SrCO3 (99.9%; High Purity Chemicals) and V2O5 (99.99%; Rare Metallic) were ground, pelletized, and preheated at 900 °C in air for 48 h with intermediate grindings. SrVO3 was obtained by annealing the Sr2V2O7 pellet at 900 °C in flowing H2−Ar (10:90 vol%) gas at a rate of 100 mL min−1 for 24 h. SrVO2H was prepared by a topoc…	Strain-induced creation and switching of anion vacancy layers in perovskite oxynitrides | Nature Communications
Synthesis of graphene oxide: GO was synthesized by a modified Hummers’ method34,59,60,61,62. In detail, 10 g graphite powder (supplied from Qingdao Zhongtian Company, China) was put into 230 mL concentrated H2SO4 under moderate stirring. Then, 30 g KMnO4 was added gradually under stirring and the solution was cold below 5 °C in an ice bath. After that, the solution was heated to 35 °C in a water-…	Rationally designed transition metal hydroxide nanosheet arrays on graphene for artificial CO2 reduction | Nature Communications
Synthesis of nickel hydroxide nanosheet arrays-graphene (Ni(OH)2-GR) composites: firstly, a certain amount of GO was dispersed into 50 mL DI water with ultrasonication for 1 h. Then, 2.5 mmol Ni(NO3)2·6H2O was dissolved into the GO solution and stirred for 0.5 h. Afterward, a 50 mL solution containing 0.25 mmol of C6H5O7Na3 and 2.5 mmol of HMTA was incorporated to the above-mixed solution and sti…	Rationally designed transition metal hydroxide nanosheet arrays on graphene for artificial CO2 reduction | Nature Communications
Preparation of nickel hydroxide nanoparticles-graphene (Ni(OH)2 NPs-GR) composite: Ni(OH)2 NPs-10%GR composite was synthesized by a simple hydrothermal method18,63. Typically, 2 mmol Ni(NO3)2·6H2O, 6 mg GO and 250 mg of urea were dispersed into 30 mL DI water with ultrasonication for 1 h. After that, the mixed solution was added into a 50 mL Teflon-lined autoclave. The hydrothermal treatment was …	Rationally designed transition metal hydroxide nanosheet arrays on graphene for artificial CO2 reduction | Nature Communications
The starting material with the nominal composition K5Ga2Bi4 (176 mg, 150 µmol), crypt-222 (280 mg, 744 µmol), and ZnPh2 (82 mg, 375 µmol) were combined in a Schlenk tube and dissolved in 4.5 ml of en. After stirring for 2 h, an intense green solution, indicating the formation of bluish-green Bi42− (ref. 55), was filtered through densely packed glass wool. The solution was stored at room temperatu…	Stabilizing a metalloid {Zn12} unit within a polymetallide environment in [K2Zn20Bi16]6− | Nature Communications
The parent material CeNbO4 was prepared by traditional solid-state reaction. The powders of CeO2 and Nb2O5 were mixed and homogenized through grinding with an agate mortar and a pestle. The mixtures were annealed at 1623 K for 10 h and then sintered at 1073 K for 10 h in flowing argon gas atmosphere. The yellow colored powder, pure phase of CeNbO4, was finally obtained. The oxidized phases CeNbO4…	Modulated structure determination and ion transport mechanism of oxide-ion conductor CeNbO4+δ | Nature Communications
In a 10 mL vial, 150 mg (0.074 mmol) of K4Pb9 and 100 mg (0.27 mmol) of [2.2.2]crypt were dissolved in ethylenediamine (2.5 mL). In a second vial, 150 mg (0.25 mmol) Au(Mes)PPh3 was dissolved in 0.5 mL toluene. The toluene solution was added to ethylenediamine solution dropwise and stirred 3 h at 60 °C while stirring vigorously. After removal of the ethylenediamine solvent, the residue was re-dis…	A family of lead clusters with precious metal cores | Nature Communications
In a typical synthesis of indium hydroxide, indium(III) chloride (3.6 g, 16.2 mmol, 98%) was dissolved in a 3:1 solution (72 mL) of anhydrous ethanol (Commercial Alcohols) and deionized water. In a separate beaker, a 3:1 mixture of ethanol and ammonium hydroxide was prepared by combining aqueous ammonium hydroxide (18 mL, Caledon, 28–30%) and of anhydrous ethanol (54 mL). The solutions were rapid…	Black indium oxide a photothermal CO2 hydrogenation catalyst | Nature Communications
The pale yellow In2O3 nanocrystal (S1) was obtained via thermal treatment of In(OH)3 nanocrystal in air at 700 °C for 5 h. The hydrogenated samples (S2−S4) were synthesized via treating S1 in tube furnace with 10%H2/Ar at a flow rate of 120 sccm. The temperatures for treatment were set as 200, 300 and 400 °C for 1 h with an increasing temperature rate of 5 °C per min. When the hydrogenation proce…	Black indium oxide a photothermal CO2 hydrogenation catalyst | Nature Communications
Si-incorporated perovskite samples were prepared by a ball-milling-assisted solid-state reaction approach. Freshly dried chemicals of SrCO3, Co3O4 and SiO2 (Sigma-Aldrich) were weighted according to the stoichiometric ratio of SrCo1–ySiyO3–δ (y = 0.00, 0.03, 0.05, 0.07 and 0.10) with different intentional Si-doping levels. The precursory powders were then mixed in an acetone medium for 1 h using …	Direct evidence of boosted oxygen evolution over perovskite by enhanced lattice oxygen participation | Nature Communications
The racemic cth ligand was prepared according to the literature41. A total of 111 g of 60% perchloric acid (0.66 mol) was slowly added into the acetone solution (1 L) of 1,2-diaminoethane (40 g, 0.67 mol) in an ice bath and was stirred overnight. The white solid of 5, 7, 7,12, 14, 14-hexamethyl-1, 4, 8, 11-tetraazacyclotetradeca-4, 11-diene diperchlorate was collected by filtration and was washed…	Macroscopic Polarization Change via Electron Transfer in a Valence Tautomeric Cobalt Complex | Nature Communications
First, a mixture of 87 mol% BaF2 (Wako Chemicals) and 13 mol% BaH2 (Stream Chemicals) was heated at 400 °C for 10 h in a flow of Ar (15 mL min–1) to put large and rigid BaF2 particles into disorder. The XRD pattern of the resulting material (modified BaF2) consisted of broad diffraction peaks due to BaF2 (Supplementary Fig. 11). No diffraction peaks due to BaH2 were observed in the XRD pattern of…	Solid solution for catalytic ammonia synthesis from nitrogen and hydrogen gases at 50 °C | Nature Communications
Cs–Ru/MgO was prepared according to previous reports2. MgO (Ube, 500A) was heated in high vacuum at 500 °C for 6 h and then stirred in a solution of Ru3(CO)12 in THF for 4 h at room temperature. After evaporating the solvent, the obtained powder was slowly heated to 450 °C in high vacuum to decompose the carbonyl precursor. The amount of Ru loading was 10 wt%. After the obtained gray powder was s…	Solid solution for catalytic ammonia synthesis from nitrogen and hydrogen gases at 50 °C | Nature Communications
The PNC electrode powder was synthesized by modified glycine-citrate combustion method, where nitric acid and glycine were used as parallel complexing agents. The precursor solution was prepared by dissolving stoichiometric amounts of Pr(NO3)3·6H2O (99.9%, Alfa Aesar), Ni(NO3)3·6H2O (99+%, Alfa Aesar), and Co(NO3)3·6H2O (99%, STREM Chemicals) in citrate-glycine aqueous solution. Under heating and…	Self-sustainable protonic ceramic electrochemical cells using a triple conducting electrode for hydrogen and power production | Nature Communications
Typically, the ACHP obtained as described above was quenched in 32.5 mL methanol (not 80 mL), and kept in the solvent (that is, 32.5 mL methanol + 5.0 mL water) which was placed in an oscillating incubator (XZQ-X160, Suzhou Peiying) at constant temperature (90 rpm, 25 °C) for 20 min. Afterwards, the resulting product was centrifuged and washed with ethanol 3 times, and dried in a vacuum desiccato…	Introducing the crystalline phase of dicalcium phosphate monohydrate | Nature Communications
The synthesis of KTiPO4F was carried out by a hydrothermal route using a 50 ml PTFE reactor with a steel shell. Initial reagents were put in the reactor in the following weight proportion: 0.12 g of titanium powder (Ti, Sigma-Aldrich >99.9%), 0.40 g of titanyl sulfate (TiOSO4, Sigma-Aldrich >99.9%), 2.04 g of monobasic potassium phosphate (KH2PO4, Sigma-Aldrich >99.9%), 0.38 g of potassium difluo…	Titanium-based potassium-ion battery positive electrode with extraordinarily high redox potential | Nature Communications
RuTe2 PNRs were deposited on VC-X72 carbon (Ru loading of 20 wt%, determined by ICP-AES) in ethanol solution by sonicating for 30 min. The resulting products were separated by centrifugation and washed several times using ethanol/acetone solution. The products were annealed at 250 °C in air for 5 h to yield a-RuTe2 PNRs. The c-RuTe2 PNRs were obtained by annealing treatment at 250 °C in Ar for 5 …	Amorphization activated ruthenium-tellurium nanorods for efficient water splitting | Nature Communications
K3LuSi2O7:xEu2+ phosphors with different Eu2+ content (x = 0–0.05) were prepared by employing solid-state reactions. The stoichiometric mixtures of K2CO3 (A.R.), Lu2O3 (99.99%), SiO2 (A.R.), and Eu2O3 (99.99%) were thoroughly grounded and transferred into an alumina crucible. After that, the mixed starting materials were sintered at 1350 °C for 6 h in a forming gas atmosphere (N2:H2 = 80:20), and…	Divalent europium-doped near-infrared-emitting phosphor for light-emitting diodes | Nature Communications
A few pure magnesium flakes of typically about 10 × 10 × 5 µm3 in size were positioned on one of the diamond anvils, with culet diameter of 250 µm. Rhenium was used as the gasket material. A small ruby chip was loaded along with the sample and used to determine the pressure inside the pressure chamber29. The diamond anvil cell (DAC) pressure chamber was then loaded with pure molecular nitrogen (~…	Synthesis of magnesium-nitrogen salts of polynitrogen anions | Nature Communications
Mn(taa) was synthesized by mixing Mn(acac) (Strem, acac = acetylacetonate) and H3taa49 in CH2Cl2 and allowing the mixture to stir overnight. After filtering through celite, the solution was dried in vacuum, dissolved in THF, and again filtered through celite. Crystals were grown using vapor diffusion of hexanes into the THF solution. Unit cell parameters determined from single crystal X-ray diffr…	Magnetoelectric behavior via a spin state transition | Nature Communications
In this work, we firstly grow single-crystalline KTP substrates using Czochralski method and then cut them into substrates with dimensions of 10 mm × 20 mm × 0.5 mm31,32. The surfaces are mechanically polished while the crystal facets and roughness are analyzed using XRD on an X-ray diffractmeter (Cu-Kα, Mniflex 600) and atomic force microscopy (AFM, Bruker Dimension Edge), respectively. We then …	Porous single-crystalline titanium dioxide at 2 cm scale delivering enhanced photoelectrochemical performance | Nature Communications
In all synthesis experiments a rhenium powder (Sigma Aldrich, 99.995%) was loaded into the sample chamber of a BX90 diamond anvil cell (Boehler–Almax anvils, 250-μm size). In four experiments the chamber was filled with nitrogen at 1.5 kbar that served as a pressure-transmitting medium and as a reagent. In two experiments, the chamber was filled either with ammonium azide NH4N3 or with sodium azi…	High-pressure synthesis of ultraincompressible hard rhenium nitride pernitride Re2(N2)(N)2 stable at ambient conditions | Nature Communications
Ammonium azide, NH4N3 was obtained by the metathesis reaction between NH4NO3 (2.666 g, 33 mmol, Sigma-Aldrich, 99.0%) and NaN3 (2.165 g, 33 mmol, Acros Organics, Geel, Belgium, 99%) in a Schlenk tube. By heating from room temperature to 170 °C in a glass oven and annealing for 7.5 h at 170 °C and then for 12 h at 185 °C, NH4N3 precipitated at the cold end of the tube separated from NaNO3, which r…	High-pressure synthesis of ultraincompressible hard rhenium nitride pernitride Re2(N2)(N)2 stable at ambient conditions | Nature Communications
Mo:BiVO4 photoanodes were fabricated by the metal organic decomposition (MOD) process and spin-coating deposition via a modified method reported by Nair32. Typically, 0.15 M Bi(NO3)3·5H2O as Bi precursor was dissolved in the solvent containing 1.5 ml ethylene glycol, 2 ml glacial acetic acid and 0.5 ml deionized water, stirred for 20 min at room temperature. Then 0.3 M VO(acac)2 as V precursor wa…	Embedding laser generated nanocrystals in BiVO4 photoanode for efficient photoelectrochemical water splitting | Nature Communications
The LaH3 was prepared by heating La metal at 400 °C for 10 h in a H2 atmosphere at 2 MPa partial pressure, and the La2O3 was used after dehydration by heating to 1200 °C and maintaining that temperature for 2 h. The two precursors were mixed in a dehydrated glass mortar and pressed to form pellets (6 mm diameter and 1–2 mm thick), and then put into a sample cell for a belt-type high-pressure appa…	Characteristic fast H− ion conduction in oxygen-substituted lanthanum hydride | Nature Communications
Sr1-xNaxRuO3 (x = 0.00, 0.05, 0.10) perovskites were synthesized in polycrystalline form by a wet-chemistry procedure to obtain very reactive precursors and reduce the final synthesis temperature. Stoichiometric amounts of Sr(NO3)2 (Sigma Aldrich 99.99% trace metals basis), Na2CO3 anhydrous (Sigma Aldrich 99.999% trace metals basis), and RuO2 (Sigma Aldrich 99.9% trace metals basis) were dissolve…	Na-doped ruthenium perovskite electrocatalysts with improved oxygen evolution activity and durability in acidic media | Nature Communications
All chemicals were purchased from Sigma-Aldrich and used without further purification. BiVO4 photoanode was prepared by reacting BiOI nanoflake arrays with vanadyl acetylacetonate38. Firstly, BiOI nanoflake arrays were grown on conductive fluorine-doped SnO2 (FTO, 14 Ω cm, 1 × 1 cm2) by a three-electrode cathodic electrodeposition at −0.1 V vs. Ag/AgCl for 5 min in a mixed solution of 50 mL of 0.…	Selective photoelectrochemical oxidation of glycerol to high value-added dihydroxyacetone | Nature Communications
Pt/np-Co0.85Se was synthesized by a electrochemical vacancy manufacturing and atom embedding strategy, which was performed using electrochemical workstation (Ivium CompactStat. h) and a conventional three-electrode cell containing 0.5 M H2SO4 (40 ml). A np-Co0.85Se ribbon, a Pt foil (2 cm × 1 cm) and an Ag/AgCl electrode were used as the work electrode, counter electrode and reference electrode, …	Single platinum atoms embedded in nanoporous cobalt selenide as electrocatalyst for accelerating hydrogen evolution reaction | Nature Communications
A typical example for CoFe-LDHs was as follows: Co(NO3)2·6H2O (4 mmol) and Fe(NO3)3·9H2O (2 mmol) were dissolved in deionized water (40 mL) to form a homogeneous solution (solution A, Co:Fe = 2:1). At the same time, aqueous solution (40 mL) of Na2CO3 (3 mmol) and NaOH (21 mmol) was prepared (solution B). Second, solution A and B were dropwise added simultaneously into a beaker with 80 ml deionize…	Boosting oxygen evolution of single-atomic ruthenium through electronic coupling with cobalt-iron layered double hydroxides | Nature Communications
RuCl3·H2O (5 mg) was placed in a flask and dissolved in 40 mL deionized water containing 0.01 M NaOH. The CoFe-LDHs (0.5 g) was added to the solution and stirred at room temperature for 12 h. The solid gray precipitant was collected by centrifugation, and then washed three times with water and ethanol. The collected sample was dried overnight under vacuum in an oven at 60 °C and named as Ru/CoFe-…	Boosting oxygen evolution of single-atomic ruthenium through electronic coupling with cobalt-iron layered double hydroxides | Nature Communications
